# Supplementary material
Source: Springer Nature journal article supplement (https://www.springermedizin.de/resource/supplementary/12885_2014_5151_MOESM2_ESM.pdf/9468546)
Supplement: MOESM2 [file 9468546]

**Additional Table 1. The results of publication bias**

| <b>Comparison</b>           | <b><i>P</i> (Begg's Test, continuity corrected)</b> | <b><i>P</i> (Egger's test)</b> |
|-----------------------------|-----------------------------------------------------|--------------------------------|
| <b>Response rate</b>        | 1                                                   | 0.727                          |
| <b>Disease control rate</b> | 0.536                                               | 0.548                          |
| <b>HR for OS</b>            | 0.631                                               | 0.139                          |
| <b>HR for PFS</b>           | 1                                                   | 0.0002                         |
| <b>CTCs change</b>          |                                                     |                                |
| <b>OS</b>                   | 1                                                   | 0.679                          |
| <b>PFS</b>                  | 0.296                                               | 0.277                          |

NOTE. HR: hazard ratio; OS: overall survival; PFS: progression free survival; CTCs: circulating tumor cells
